# Supplementary material
Source: publisher figshare collection journal article supplement (https://acs.figshare.com/ndownloader/files/8509073)
Supplement: Supplementary file 1 [file 8509073]

## Supporting Information

### High-affinity RGD-knottin peptide as a new tool for rapid evaluation of the binding strength of unlabeled RGD-peptides to $\alpha_v\beta_3$ , $\alpha_v\beta_5$ , and $\alpha_5\beta_1$ integrin receptors

D.Bernhagen<sup>a</sup>, L. De Laporte<sup>b</sup>, P. Timmerman<sup>a,c\*</sup>

*a: Pepscan Therapeutics, Zuidersluisweg 2, 8243 RC Lelystad, The Netherlands*

*b: DWI – Leibniz Institute for Interactive Materials, Forckenbeckstr. 50, 52056 Aachen, Germany*

*c: Van't Hoff Institute for Molecular Sciences, University of Amsterdam, Sciencepark 904 XH Amsterdam, The Netherlands*

#### Table of contents

|             |                                                                         |
|-------------|-------------------------------------------------------------------------|
| <b>S-2:</b> | General Information                                                     |
|             | Synthesis protocol for biotinylated peptides <b>1a-c</b>                |
|             | Synthesis protocol for peptides <b>2a-c</b>                             |
| <b>S-3:</b> | UPLC/MS spectrum of purified knottin-RGD peptide <b>1a</b> (Figure S-1) |
| <b>S-4:</b> | UPLC/MS spectrum of purified cyclic-RGD peptide <b>2a</b> (Figure S-2)  |
| <b>S-5:</b> | Protocol for ELISA experiments                                          |
|             | Schematic setup of binding and competition ELISA (Figure S-3)           |
| <b>S-6:</b> | Exemplary binding ELISA results (Figure S-4)                            |
|             | Exemplary competition ELISA results (Figure S-5)                        |

## General

UPLC analysis was performed on a Waters Acquity Ultra Performance LC System, equipped with a Waters Acquity UPLC BEH130 C18 1.7  $\mu\text{m}$  column. A linear gradient of 5-55% ACN (0.05% TFA) in  $\text{H}_2\text{O}$  (0.05% TFA) was used. Peptides were purified by preparative HPLC (Waters Prep LC) on an RP-C18 column (Reposil-Pur 120 C18-AQ 150x20 mm, Dr. Maisch GmbH, Ammerbuch, Germany) using an ACN/ $\text{H}_2\text{O}$  gradient (5-65%) including 0.05% TFA.

### Synthesis protocol for biotinylated peptides **1a-c**

Biotinylated peptides **1a-c** were synthesized in two steps. First, the linear peptide was synthesized via Fmoc-based solid-phase peptide synthesis (SPPS) on a Rink-amide resin using standard protocols. Second, linear peptide was folded using following protocol (example): Linear precursor of **1a** (20 mg, 5.2  $\mu\text{mol}$ ) was dissolved at 0.1  $\mu\text{M}$  in miliQ water containing 2.2 M guanidinium hydrochloride (GuHCl), further referred to as peptide solution. Folding buffer (twice the volume of peptide solution) was made by dissolving cysteine (55.8 mg, 460  $\mu\text{mol}$ ) and cystine (13.4 mg, 55.7  $\mu\text{mol}$ ) in 1 M GuHCl and 25 mM Tris buffer (pH 8). After sonication and filtration, peptide solution was slowly added and reacted 24 h at r.t. without stirring. The reaction was quenched with 10% TFA solution until  $\text{pH} < 4$  and the oxidized product subsequently purified via HPLC.  $[\text{M}+3\text{H}]^{3+}$  calculated for **1a**: 1269.18, found: 1270.26 (Figure S1).

### Synthesis protocol for peptides **2a-c**

Peptides **2a-c** were synthesized via Fmoc-based solid-phase peptide synthesis (SPPS) on a 2-chlorotrityl resin using standard protocols, starting with coupling of Gly to prevent racemization in backbone cyclization. For **2a+b**, a lysine residue that carried an Fmoc-protected side chain and an ivDde-protected *N*-terminus was used. After Fmoc-deprotection, subsequent linker coupling, and biotinylation of the lysine side chain, the ivDde group was removed using 2% hydrazine in DMF, and the remaining amino acids were coupled. Then, the peptide was cleaved with 2% TFA/DCM and isolated as a fully side-chain protected peptide, which was then backbone-cyclized using the following protocol: to a solution of fully side-chain protected peptide in DCM (0.3 mM) was added PyBop (2 eq) and after 20 min *N,N*-diisopropylethylamine (10 eq). After reaction overnight at room temperature, solvent was removed in vacuum and 1.5 mL per 40  $\mu\text{mol}$  peptide of 95% TFA were added to fully deprotect the cyclized peptide. After 2h, peptide was precipitated 2 times with 1:1 Ether/*N*-pentane, and after lyophilization, the peptide was purified via HPLC.  $m/z$  calculated for **2a**: 1119.54, found: 1119.48 (Figure S2).

## Spectra

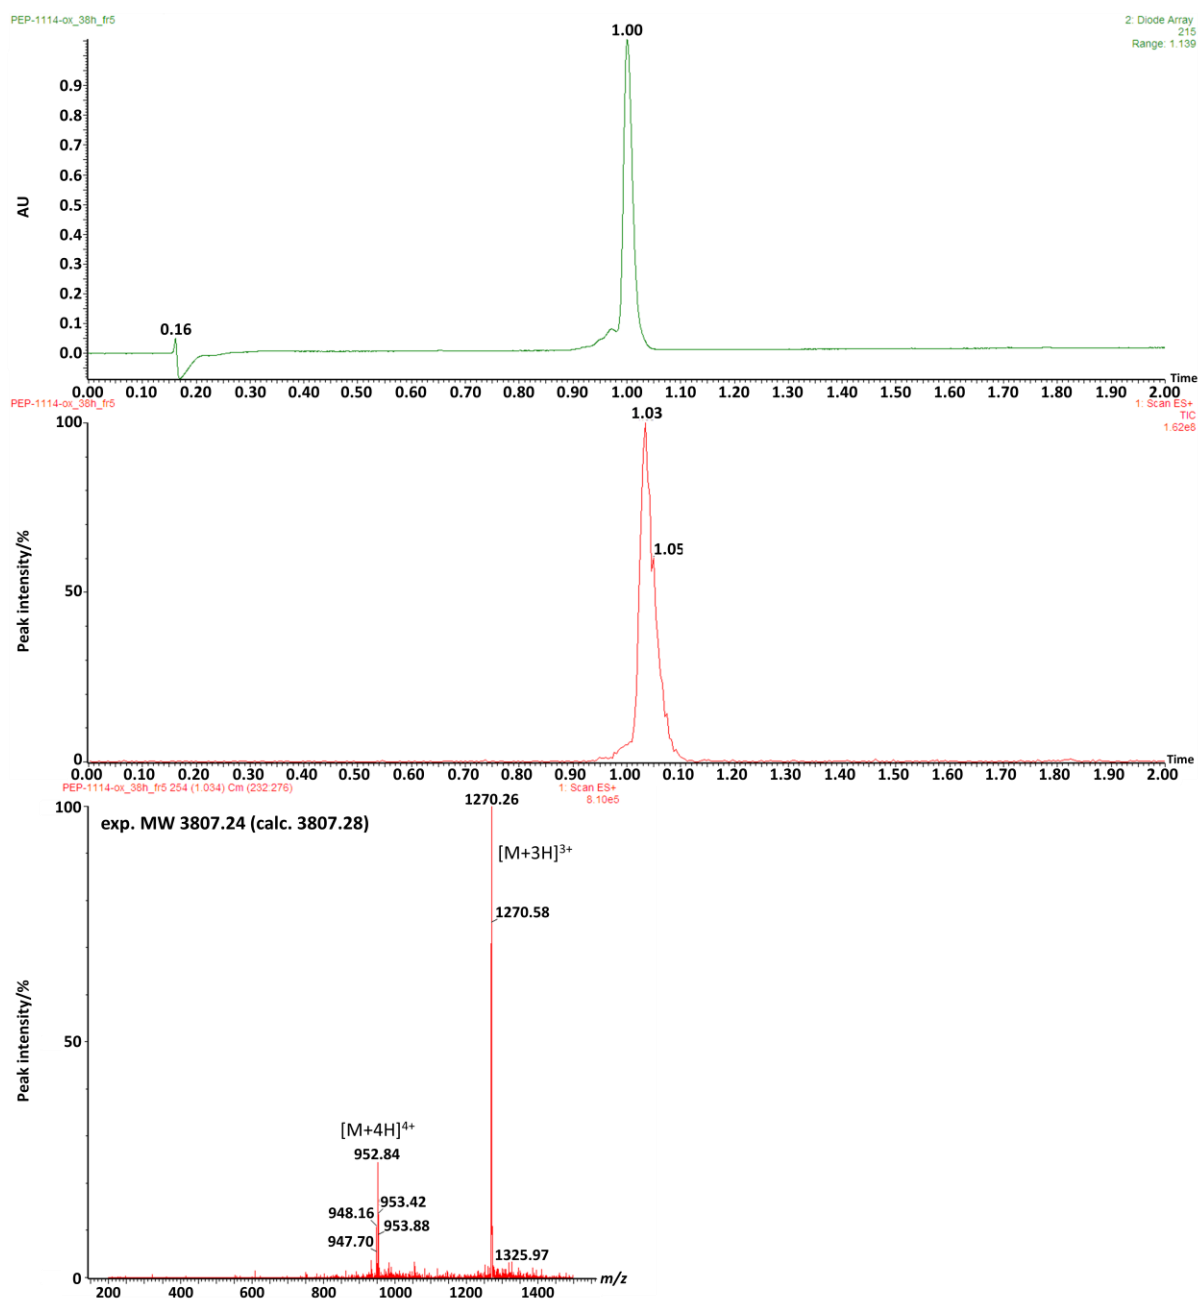

Figure S-1. UPLC/MS spectrum of purified knottin-RGD peptide **1a** (top: UV detection at 215 nm, middle/bottom: ESI-MS detection).

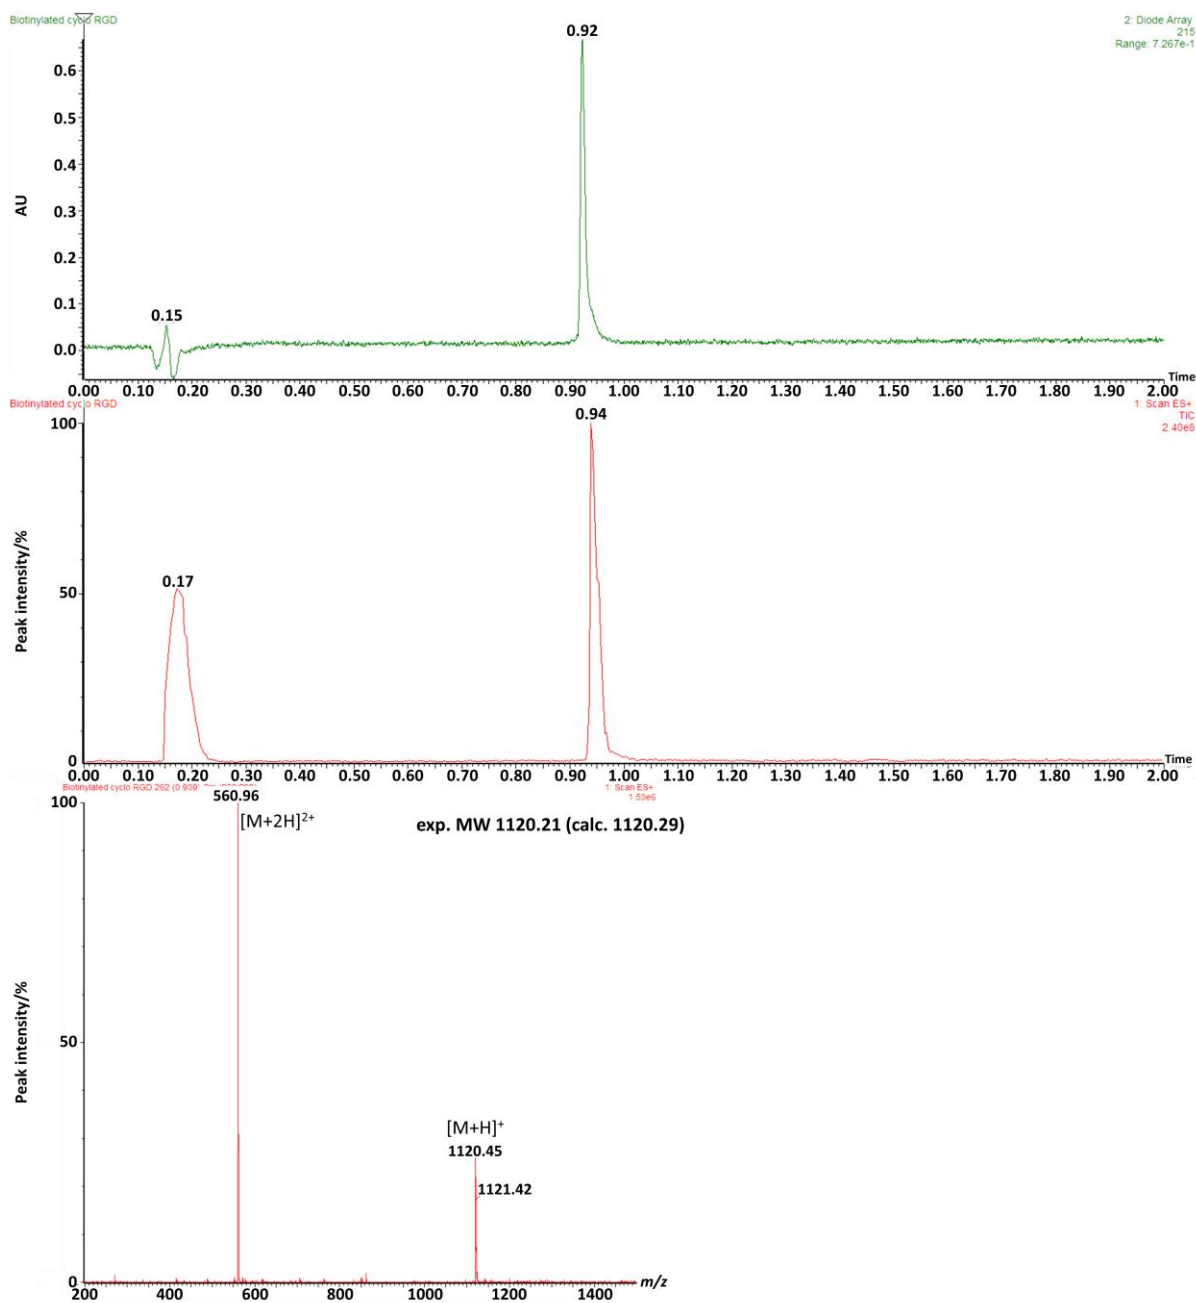

Figure S-2. UPLC/MS spectrum of purified cyclic-RGD peptide **2a** (top: UV detection at 215 nm, middle/bottom: ESI-MS detection).

## ELISA

All integrins were dissolved according to manufacturer's protocol and stored in 25  $\mu$ L aliquots of 100  $\mu$ g/mL in PBS. For coating of one 96 well plate, 2 aliquots were thawed and dissolved in 9.95 mL of cold coating buffer for a 0.5  $\mu$ g/mL solution. After coating, the plates were subsequently sealed and stored at 4  $^{\circ}$ C overnight. Integrin was removed and plates were blocked with 150  $\mu$ L 1% I-Block solution for 1h at room temperature. The following washing and incubation steps were performed according to manuscript. ABTS substrate buffer was prepared by mixing substrate buffer pH 4, 20 g/L ABTS and 3%  $\text{H}_2\text{O}_2$  in the volumetric ratio 10/0.25/0.02. A schematic setup of the binding ELISA and competition ELISA is shown in Figure S3. Exemplary ELISA experiment results are shown in Figures S4 (binding ELISA) and S5 (competition ELISA).

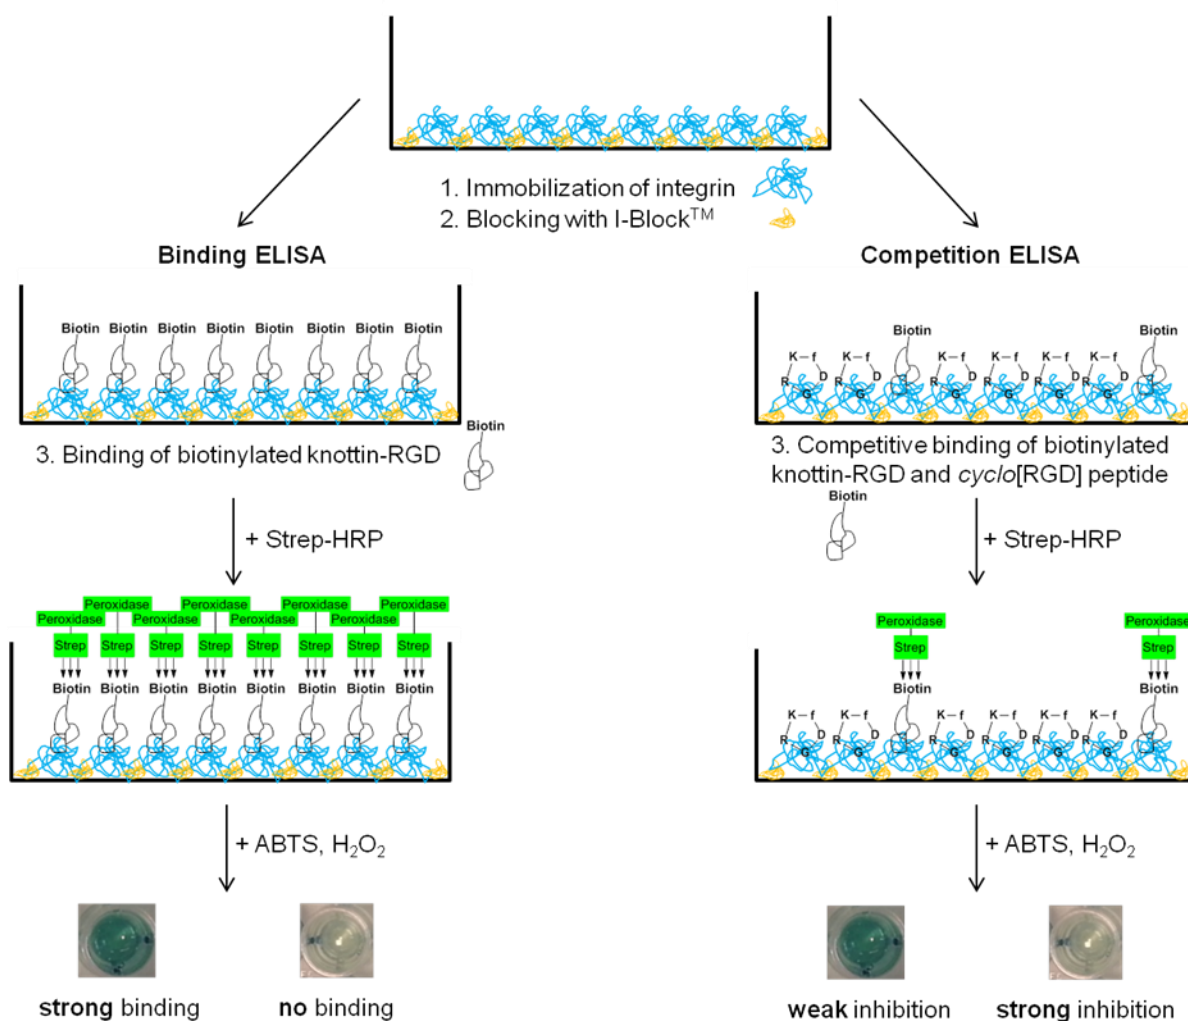

Fig. S-3. Schematic setup of the direct binding ELISA (left) and competition ELISA (right). Color change is induced by biotin-bound streptavidin-horseradish peroxidase ("Peroxidase-Strep").

| Plate A                                      |                   |         |                                 |      |      |      |      |      |      |      |      |      | Peptide 2b [μM]           |      |      |
|----------------------------------------------|-------------------|---------|---------------------------------|------|------|------|------|------|------|------|------|------|---------------------------|------|------|
|                                              |                   |         | c <sub>comp. Peptide</sub> [μM] | 10   |      |      | 1    |      |      | 0.1  |      |      | A: 10, B: 1, C: 0.1, D: 0 |      |      |
| Integrin                                     | Washing           | Peptide | Polysorp                        | 1    | 2    | 3    | 4    | 5    | 6    | 7    | 8    | 9    | 10                        | 11   | 12   |
| α <sub>5</sub> β <sub>1</sub><br>(0.5 μg/mL) | with<br>Ca, Mg    | 1a      | A                               | 1.39 | 1.29 | 1.12 | 0.77 | 0.93 | 0.92 | 0.44 | 0.47 | 0.44 | 0.19                      | 0.18 | 0.18 |
|                                              |                   | 1b      | B                               | 0.33 | 0.27 | 0.28 | 0.20 | 0.20 | 0.21 | 0.16 | 0.19 | 0.20 | 0.18                      | 0.15 | 0.17 |
|                                              |                   | 1c      | C                               | 0.29 | 0.24 | 0.24 | 0.18 | 0.19 | 0.19 | 0.20 | 0.19 | 0.19 | 0.19                      | 0.16 | 0.18 |
|                                              |                   | 2a      | D                               | 0.38 | 0.35 | 0.30 | 0.27 | 0.25 | 0.26 | 0.19 | 0.20 | 0.18 | 0.18                      | 0.17 | 0.17 |
|                                              | without<br>Ca, Mg | 1a      | E                               | 0.73 | 0.68 | 0.62 | 0.40 | 0.42 | 0.39 | 0.22 | 0.25 | 0.25 | 0.14                      | 0.17 | 0.16 |
|                                              |                   | 1b      | F                               | 0.25 | 0.22 | 0.29 | 0.18 | 0.18 | 0.17 | 0.18 | 0.16 | 0.15 | 0.15                      | 0.16 | 0.16 |
|                                              |                   | 1c      | G                               | 0.25 | 0.22 | 0.24 | 0.13 | 0.15 | 0.17 | 0.18 | 0.19 | 0.16 | 0.16                      | 0.13 | 0.14 |
|                                              |                   | 2a      | H                               | 0.30 | 0.31 | 0.29 | 0.22 | 0.24 | 0.23 | 0.17 | 0.16 | 0.15 | 0.14                      | 0.16 | 0.14 |

Figure S-4. Absorbances determined in a binding ELISA experiment. Background colors range from white (O.D. 0) to green (O.D. 4). The data show that only knottin-RGD peptide **1a** clearly binds to integrin  $\alpha_5\beta_1$ .

| PLATE A                          |               | c <sub>comp. Peptide</sub> [μM] | 30   | 10   | 3.3333 | 1.1111 | 0.3704 | 0.1235 | 0.0412 | 0.0137 | 0.0046 | 0.0015 | 0.0005 | 0.0002 |
|----------------------------------|---------------|---------------------------------|------|------|--------|--------|--------|--------|--------|--------|--------|--------|--------|--------|
| Integrin                         | comp. Peptide |                                 |      |      |        |        |        |        |        |        |        |        |        |        |
| $\alpha_v\beta_3$<br>(0.5 μg/mL) | 1d            | A                               | 0.18 | 0.19 | 0.18   | 0.23   | 0.73   | 1.48   | 1.70   | 1.82   | 1.74   | 1.68   | 1.73   | 1.85   |
|                                  |               | B                               | 0.18 | 0.17 | 0.17   | 0.21   | 0.63   | 1.31   | 1.58   | 1.53   | 1.56   | 1.58   | 1.63   | 1.58   |
|                                  |               | C                               | 0.21 | 0.14 | 0.17   | 0.21   | 0.59   | 1.23   | 1.49   | 1.54   | 1.47   | 1.64   | 1.64   | 1.69   |
|                                  | 2c            | D                               | 0.20 | 0.19 | 0.25   | 0.40   | 0.63   | 0.99   | 1.21   | 1.30   | 1.43   | 1.62   | 1.58   | 1.66   |
|                                  |               | E                               | 0.18 | 0.20 | 0.25   | 0.40   | 0.65   | 0.97   | 1.27   | 1.33   | 1.36   | 1.59   | 1.64   | 1.75   |
|                                  |               | F                               | 0.18 | 0.20 | 0.27   | 0.39   | 0.73   | 1.10   | 1.36   | 1.44   | 1.51   | 1.58   | 1.62   | 1.82   |
|                                  | no peptide    | G                               | 1.83 | 1.78 | 1.69   |        |        |        |        |        |        |        |        |        |
| PLATE B                          |               | c <sub>comp. Peptide</sub> [μM] | 30   | 10   | 3.3333 | 1.1111 | 0.3704 | 0.1235 | 0.0412 | 0.0137 | 0.0046 | 0.0015 | 0.0005 | 0.0002 |
| Integrin                         | Peptide       | Polysorp                        | 1    | 2    | 3      | 4      | 5      | 6      | 7      | 8      | 9      | 10     | 11     | 12     |
| $\alpha_v\beta_3$<br>(0.5 μg/mL) | GRGDS         | A                               | 0.42 | 0.72 | 1.22   | 1.46   | 1.69   | 1.72   | 1.75   | 1.72   | 1.63   | 1.75   | 1.72   | 2.45   |
|                                  |               | B                               | 0.41 | 0.65 | 1.06   | 1.29   | 1.45   | 1.50   | 1.55   | 1.52   | 1.52   | 1.62   | 2.69*  | 2.24   |
|                                  |               | C                               | 0.45 | 0.76 | 0.98   | 1.27   | 1.44   | 1.54   | 1.57   | 1.55   | 1.56   | 1.52   | 3.17*  | 2.15   |
|                                  | cylcoFYFDLRK  | D                               | 1.81 | 1.69 | 1.67   | 1.61   | 1.56   | 1.54   | 1.58   | 1.53   | 1.42   | 1.48   | 1.67   | 1.93   |
|                                  |               | E                               | 1.79 | 1.64 | 1.73   | 3.28*  | 1.57   | 1.59   | 1.60   | 1.62   | 1.70   | 1.71   | 1.59   | 1.76   |
|                                  |               | F                               | 1.84 | 1.67 | 1.71   | 1.66   | 1.64   | 1.66   | 1.67   | 1.58   | 1.70   | 1.72   | 1.63   | 1.73   |

Figure S-5. Absorbances determined in a competition ELISA experiment with integrin  $\alpha_v\beta_3$ . Background colors range from white (O.D. 0) to green (O.D. 4) and depend on the peptide and its concentration. \* Those values were not considered for IC<sub>50</sub> calculation.
